# Supplementary material
Source: Springer Nature journal article supplement (https://www.springermedizin.de/resource/supplementary/12935_2012_371_MOESM4_ESM.docx/9540414)

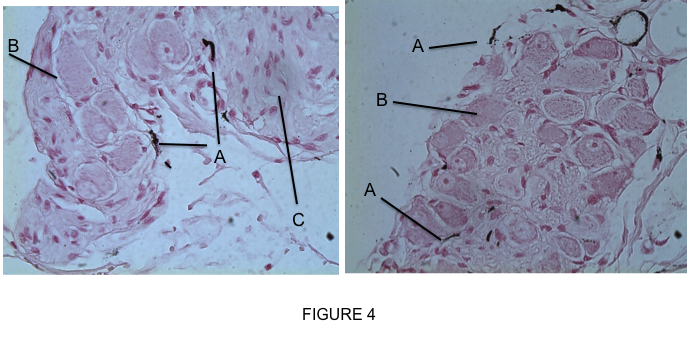

Supplement: MOESM4 [file 9540414]
